# Supplementary material
Source: PubMed Central journal article supplement (PMC3983720)
Supplement: NIHMS567949-supplement-Supplementary_Data.pdf [file NIHMS567949-supplement-Supplementary_Data.pdf]

**\*\* Please see gray box at the bottom of the manuscript for the link to the Supplementary info**
